# Supplementary material
Source: Springer Nature journal article supplement (https://www.springermedizin.de/resource/supplementary/12982_2007_53_MOESM7_ESM.pdf/9604370)
Supplement: MOESM7 [file 9604370]

Filipino / Pilipino / Tagalog

Editoryal

**Pagpalawak ng Partisipasyon sa mga Hindi Maka-komprende ng Ingles:  
Pag-tanggal ng Limitasyon sa Lengguahe**

May-akda: Isaac Chun-Hai FUNG

Abstrakto

Pinapaliwanag nitong editoryal ang mga problema ng limitasyon ng salita sa lengguahe, kahit sa kasalukuyang tagumpay ng 'Pagpalawak sa Partisipasyon' (Open Participation Movement / Open Access Movement).

Apat na opsyon para sa diurnal na Ingles ang salita para sa Pag-tanggal ng Limitasyon sa Lengguahe. Heto ang nasusunod:

- 1) Abstrakto ng panibagong lengguahe ng may-akda,
  - 2) Pabukas na translasyon galing sa 'Wiki',
  - 3) Translasyon galing sa kasapi ng Pinunong Internasyonal translasyon-editoryal,
- at 4) Panibong lengguahe ng diurnal.

Ang diurnal 'Bagong Tema ng Epedimiyolohiya' (Emerging Themes in Epidemiology) ay importanteng pinapa-alam sa lahat na ito ay tumatanggap ng translasyon ng abstrakto o ng buong artikulo ng mga may-akda para sa adisyonal na literatura.
